# Supplementary material
Source: Springer Nature journal article supplement (https://www.springermedizin.de/resource/supplementary/12936_2014_3377_MOESM8_ESM.pdf/9545790)
Supplement: MOESM8 [file 9545790]

Hakizimana T4.

Table 4. LLIN durability associated with fabric integrity.

| cell                  | Cyimo   | Rusheshe   | Bungwe  | Bushenya   | Rutabo  | Burima     |
|-----------------------|---------|------------|---------|------------|---------|------------|
| LLIN type             | p-ester | p-ethylene | p-ester | p-ethylene | p-ester | p-ethylene |
| <b>T<sub>0</sub></b>  |         |            |         |            |         |            |
| good                  | 100     | 100        | 100     | 100        | 100     | 100        |
| serviceable           | 0       | 0          | 0       | 0          | 0       | 0          |
| replace               | 0       | 0          | 0       | 0          | 0       | 0          |
| <b>T<sub>12</sub></b> |         |            |         |            |         |            |
| good                  | 47      | 20         | 67      | 37         | 27      | 60         |
| serviceable           | 20      | 43         | 13      | 13         | 37      | 27         |
| replace               | 33      | 37         | 20      | 50         | 13      | 13         |
| <b>T<sub>24</sub></b> |         |            |         |            |         |            |
| good                  | 10      | 3          | 3       | 3          | 10      | 6          |
| serviceable           | 27      | 7          | 47      | 50         | 37      | 47         |
| replace               | 63      | 90         | 50      | 47         | 53      | 47         |

\* estimated % associated with threepHI-related conditions: pHI<64 - 'good', 64<pHI<768 - 'serviceable', pHI>768 - 'replace'
